## Correction

### **Correction to: Embracing heterogeneity: Why plural understandings strengthen interdisciplinarity and transdisciplinarity**

This is a correction to: Bianca Vienni-Baptista, Isabel Fletcher, Catherine Lyall, Christian Pohl, Embracing heterogeneity: Why plural understandings strengthen interdisciplinarity and transdisciplinarity, *Science and Public Policy*, 2022; scac034, <https://doi.org/10.1093/scipol/scac034>

In the originally published version of this manuscript, Note 9 and several items in the reference list were incorrect.

The publisher apologizes for not correcting these errors at an earlier production stage. The errors have now been corrected.
